# Supplementary material
Source: PubMed Central journal article supplement (PMC2714727)

**Figure S1:** Distribution of (A) LINE elements, (B) SINE elements, (C) LTR retrotransposons, and (D) DNA transposons near gene promoters at which methylation was unchanged, decreased, or increased from E17.5 to P21.

**A. LINE elements**

**Methylation Unchanged**

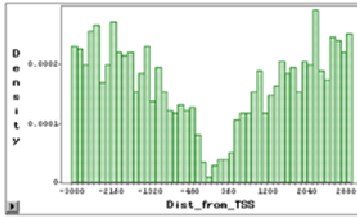

| Moments  |            |          |            |
|----------|------------|----------|------------|
| N        | 1624.0000  | Sum Mjts | 1624.0000  |
| Mean     | -33.0881   | Sum      | -53735.000 |
| Std Dev  | 1958.4613  | Variance | 3835570.79 |
| Skewness | 0.0418     | Kurtosis | -1.5257    |
| USS      | 6.227E+03  | CSS      | 6.225E+09  |
| CV       | -5918.9278 | Std Mean | 48.5984    |

**Methylation Decreased**

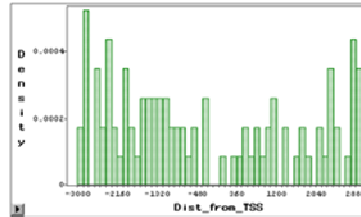

| Moments  |           |          |            |
|----------|-----------|----------|------------|
| N        | 35.0000   | Sum Mjts | 35.0000    |
| Mean     | -316.3263 | Sum      | -29481.000 |
| Std Dev  | 1934.6831 | Variance | 3742398.78 |
| Skewness | 0.3409    | Kurtosis | -1.2788    |
| USS      | 360936615 | CSS      | 351841885  |
| CV       | -623.4351 | Std Mean | 198.4943   |

**Methylation Increased**

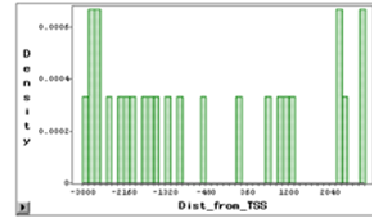

| Moments  |           |          |            |
|----------|-----------|----------|------------|
| N        | 25.0000   | Sum Mjts | 25.0000    |
| Mean     | -557.5200 | Sum      | -13938.000 |
| Std Dev  | 2004.5622 | Variance | 4018269.59 |
| Skewness | 0.4285    | Kurtosis | -1.3884    |
| USS      | 104209184 | CSS      | 96438470.2 |
| CV       | -359.5498 | Std Mean | 400.3124   |

**B. SINE elements**

**Methylation Unchanged**

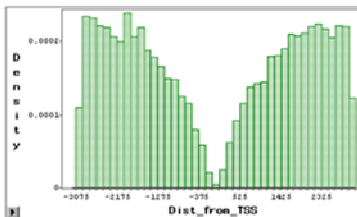

| Moments  |            |          |            |
|----------|------------|----------|------------|
| N        | 14652.0000 | Sum Mjts | 14652.0000 |
| Mean     | -5.0993    | Sum      | -73264.000 |
| Std Dev  | 1954.7472  | Variance | 3821036.59 |
| Skewness | 0.0011     | Kurtosis | -1.5323    |
| USS      | 5.538E+10  | CSS      | 5.538E+10  |
| CV       | -39092.810 | Std Mean | 16.1489    |

**Methylation Decreased**

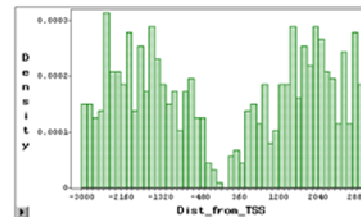

| Moments  |           |          |            |
|----------|-----------|----------|------------|
| N        | 719.0000  | Sum Mjts | 719.0000   |
| Mean     | 33.8734   | Sum      | 24355.0000 |
| Std Dev  | 1880.1052 | Variance | 3534810.56 |
| Skewness | 0.0955    | Kurtosis | -1.5042    |
| USS      | 2.538E+09 | CSS      | 2.538E+09  |
| CV       | 5550.3942 | Std Mean | 70.1162    |

**Methylation Increased**

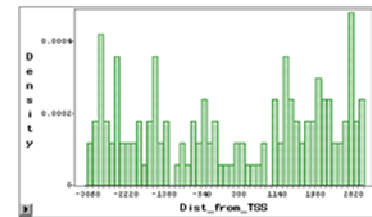

| Moments  |           |          |            |
|----------|-----------|----------|------------|
| N        | 139.0000  | Sum Mjts | 139.0000   |
| Mean     | 136.1073  | Sum      | 18919.0000 |
| Std Dev  | 1367.4743 | Variance | 387957.50  |
| Skewness | -0.1191   | Kurtosis | -1.4587    |
| USS      | 536767161 | CSS      | 534192135  |
| CV       | 1445.5257 | Std Mean | 166.8790   |

**C. LTR retrotransposons**

**Methylation Unchanged**

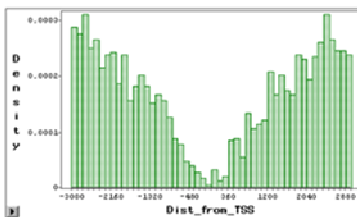

| Moments  |            |          |            |
|----------|------------|----------|------------|
| N        | 2231.0000  | Sum Mjts | 2231.0000  |
| Mean     | -19.3922   | Sum      | -43264.000 |
| Std Dev  | 2051.9364  | Variance | 4210689.34 |
| Skewness | 0.0095     | Kurtosis | -1.6235    |
| USS      | 3.391E+09  | CSS      | 3.390E+09  |
| CV       | -10581.555 | Std Mean | 43.4427    |

**Methylation Decreased**

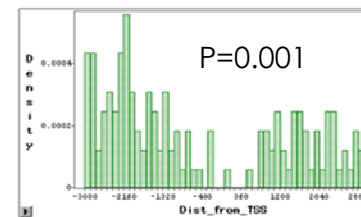

| Moments  |           |          |            |
|----------|-----------|----------|------------|
| N        | 135.0000  | Sum Mjts | 135.0000   |
| Mean     | -585.2667 | Sum      | -79011.000 |
| Std Dev  | 1915.2213 | Variance | 3668072.60 |
| Skewness | 0.4590    | Kurtosis | -1.3443    |
| USS      | 59764233  | CSS      | 491521728  |
| CV       | -327.2391 | Std Mean | 164.8360   |

**Methylation Increased**

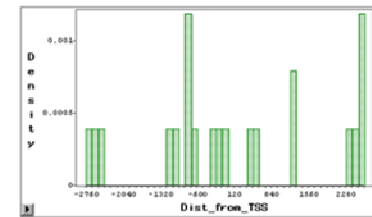

| Moments  |            |          |            |
|----------|------------|----------|------------|
| N        | 21.0000    | Sum Mjts | 21.0000    |
| Mean     | 123.1429   | Sum      | 2586.0000  |
| Std Dev  | 1726.3045  | Variance | 2982475.43 |
| Skewness | 0.0573     | Kurtosis | -0.3775    |
| USS      | 59967955.0 | CSS      | 59649508.6 |
| CV       | 1402.4236  | Std Mean | 376.8589   |

**D. DNA transposons**

**Methylation Unchanged**

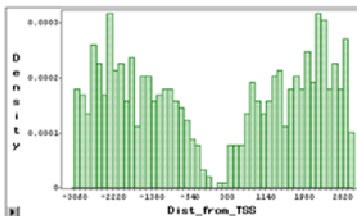

| Moments  |           |          |            |
|----------|-----------|----------|------------|
| N        | 795.0000  | Sum Mjts | 795.0000   |
| Mean     | 28.3913   | Sum      | 20836.0000 |
| Std Dev  | 1960.6573 | Variance | 3844176.87 |
| Skewness | -0.0132   | Kurtosis | -1.5383    |
| USS      | 2.826E+09 | CSS      | 2.825E+09  |
| CV       | 6905.8972 | Std Mean | 72.2708    |

**Methylation Decreased**

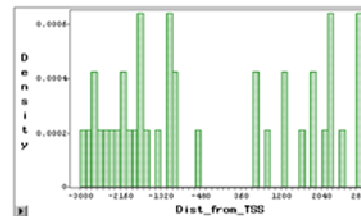

| Moments  |           |          |            |
|----------|-----------|----------|------------|
| N        | 39.0000   | Sum Mjts | 39.0000    |
| Mean     | -949.6923 | Sum      | -13638.000 |
| Std Dev  | 1936.2525 | Variance | 3785024.17 |
| Skewness | 0.3446    | Kurtosis | -1.5194    |
| USS      | 15620022  | CSS      | 151430918  |
| CV       | -570.8597 | Std Mean | 319.6562   |

**Methylation Increased**

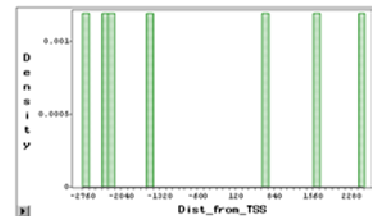

| Moments  |            |          |            |
|----------|------------|----------|------------|
| N        | 7.0000     | Sum Mjts | 7.0000     |
| Mean     | -570.7143  | Sum      | -3995.0000 |
| Std Dev  | 2122.9620  | Variance | 4506882.57 |
| Skewness | 0.5056     | Kurtosis | -1.8527    |
| USS      | 29321239.0 | CSS      | 27041295.4 |
| CV       | -371.9798  | Std Mean | 802.3966   |

**Figure S2:** Venn diagrams illustrating the prevalence of polycomb targets among genes in which methylation was gained, unchanged, or lost from E17.5 to P21.

Gained methylation

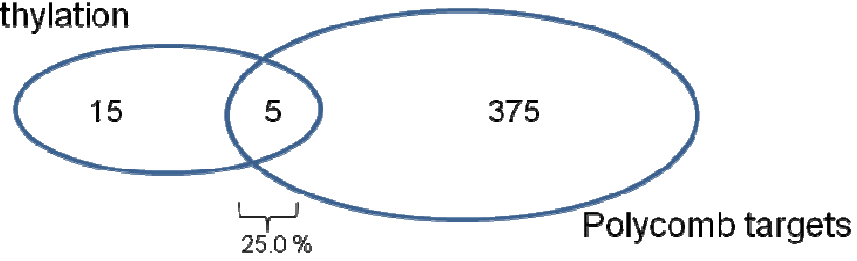

Methylation unchanged

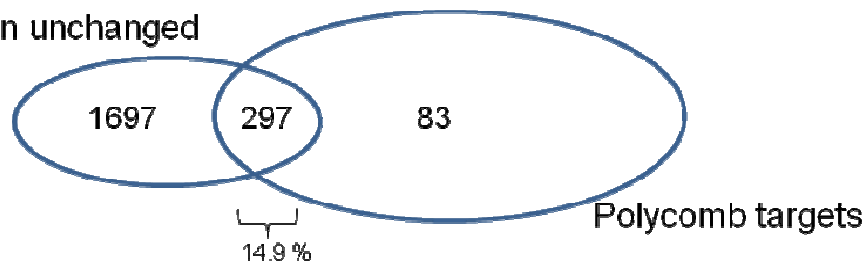

Lost methylation

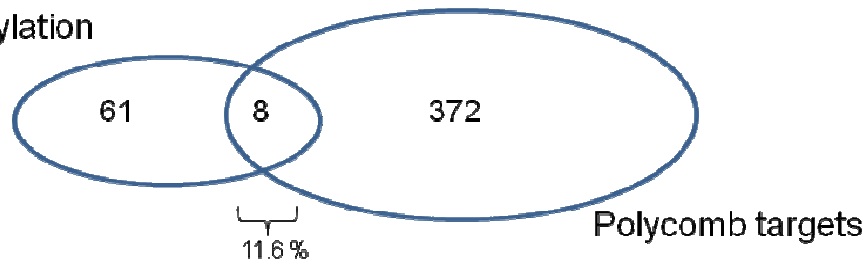

**Figure S3:** Percent methylation vs. age from P21 to P120, for the six genes evaluated for methylation dynamics from E17.5 to P21.

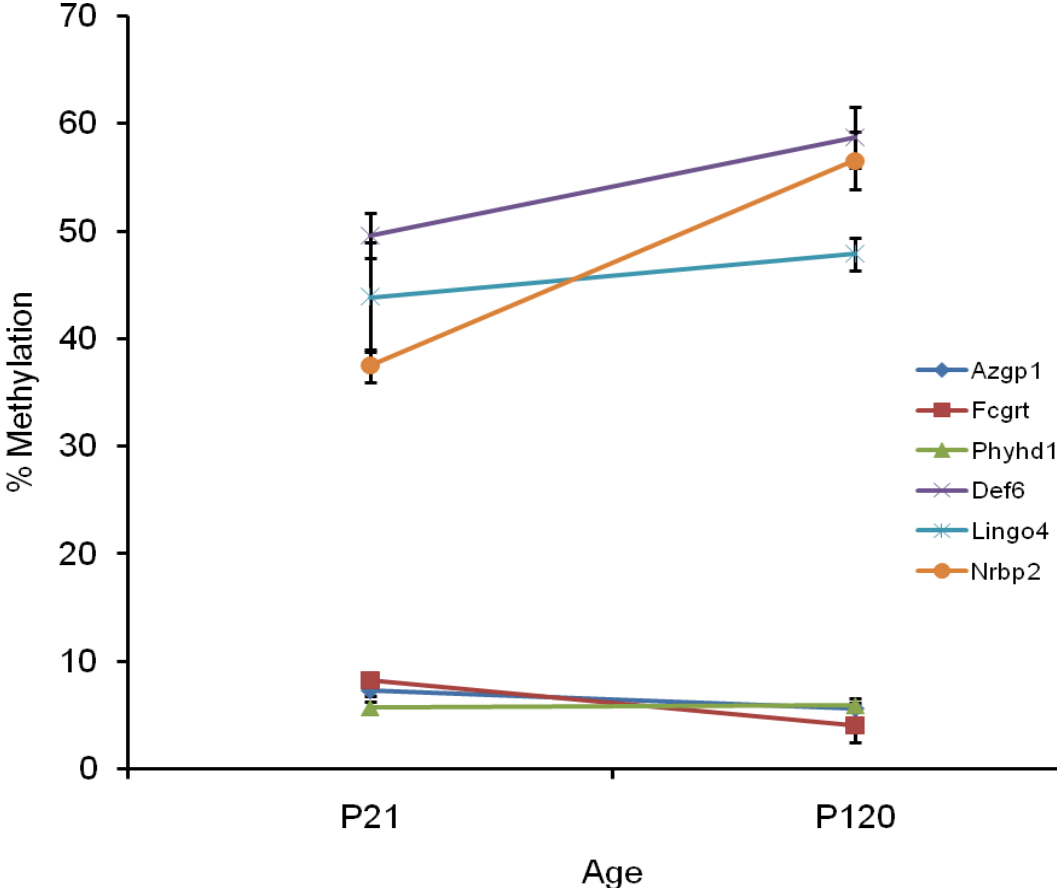

Supplement: ddp241_1.pdf [file ddp241_1.pdf]
